# Supplementary material
Source: PubMed Central journal article supplement (PMC2084322)

a)

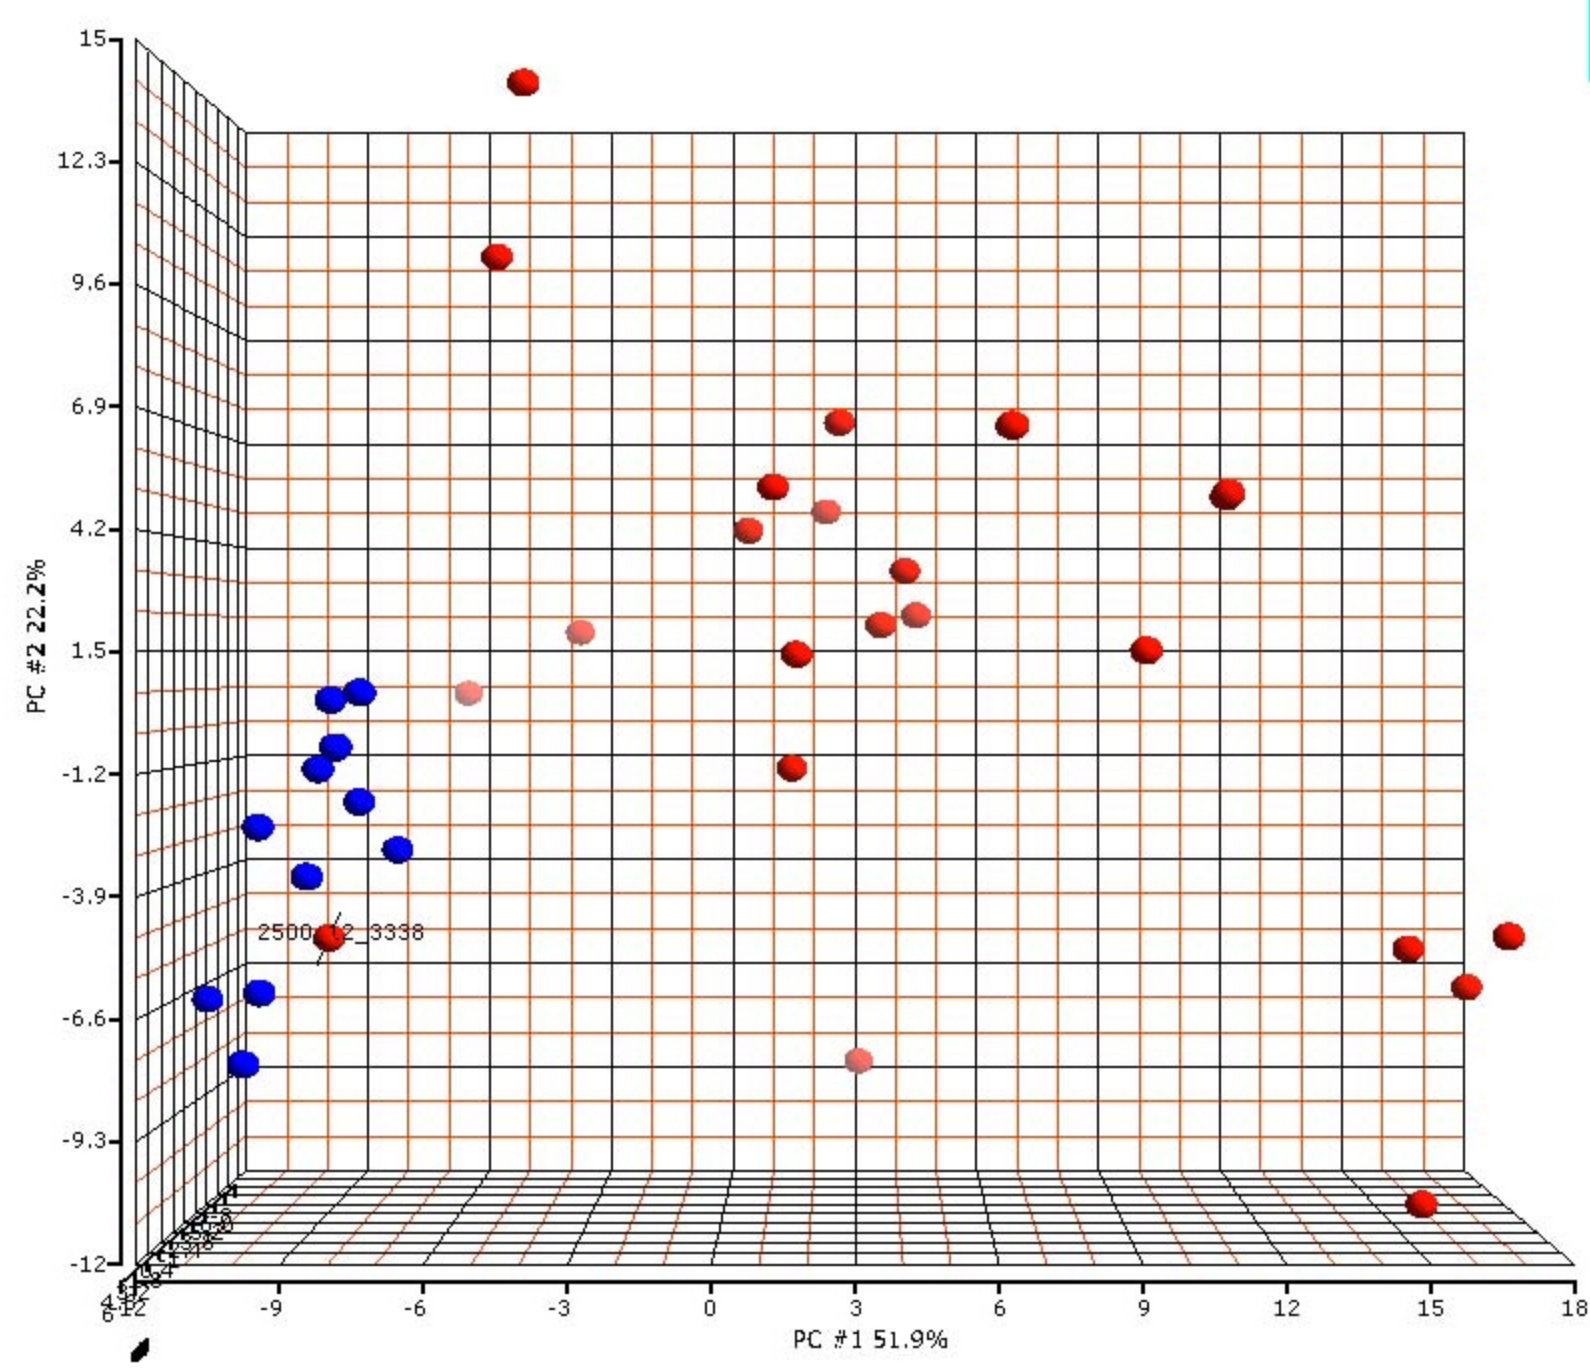

b)

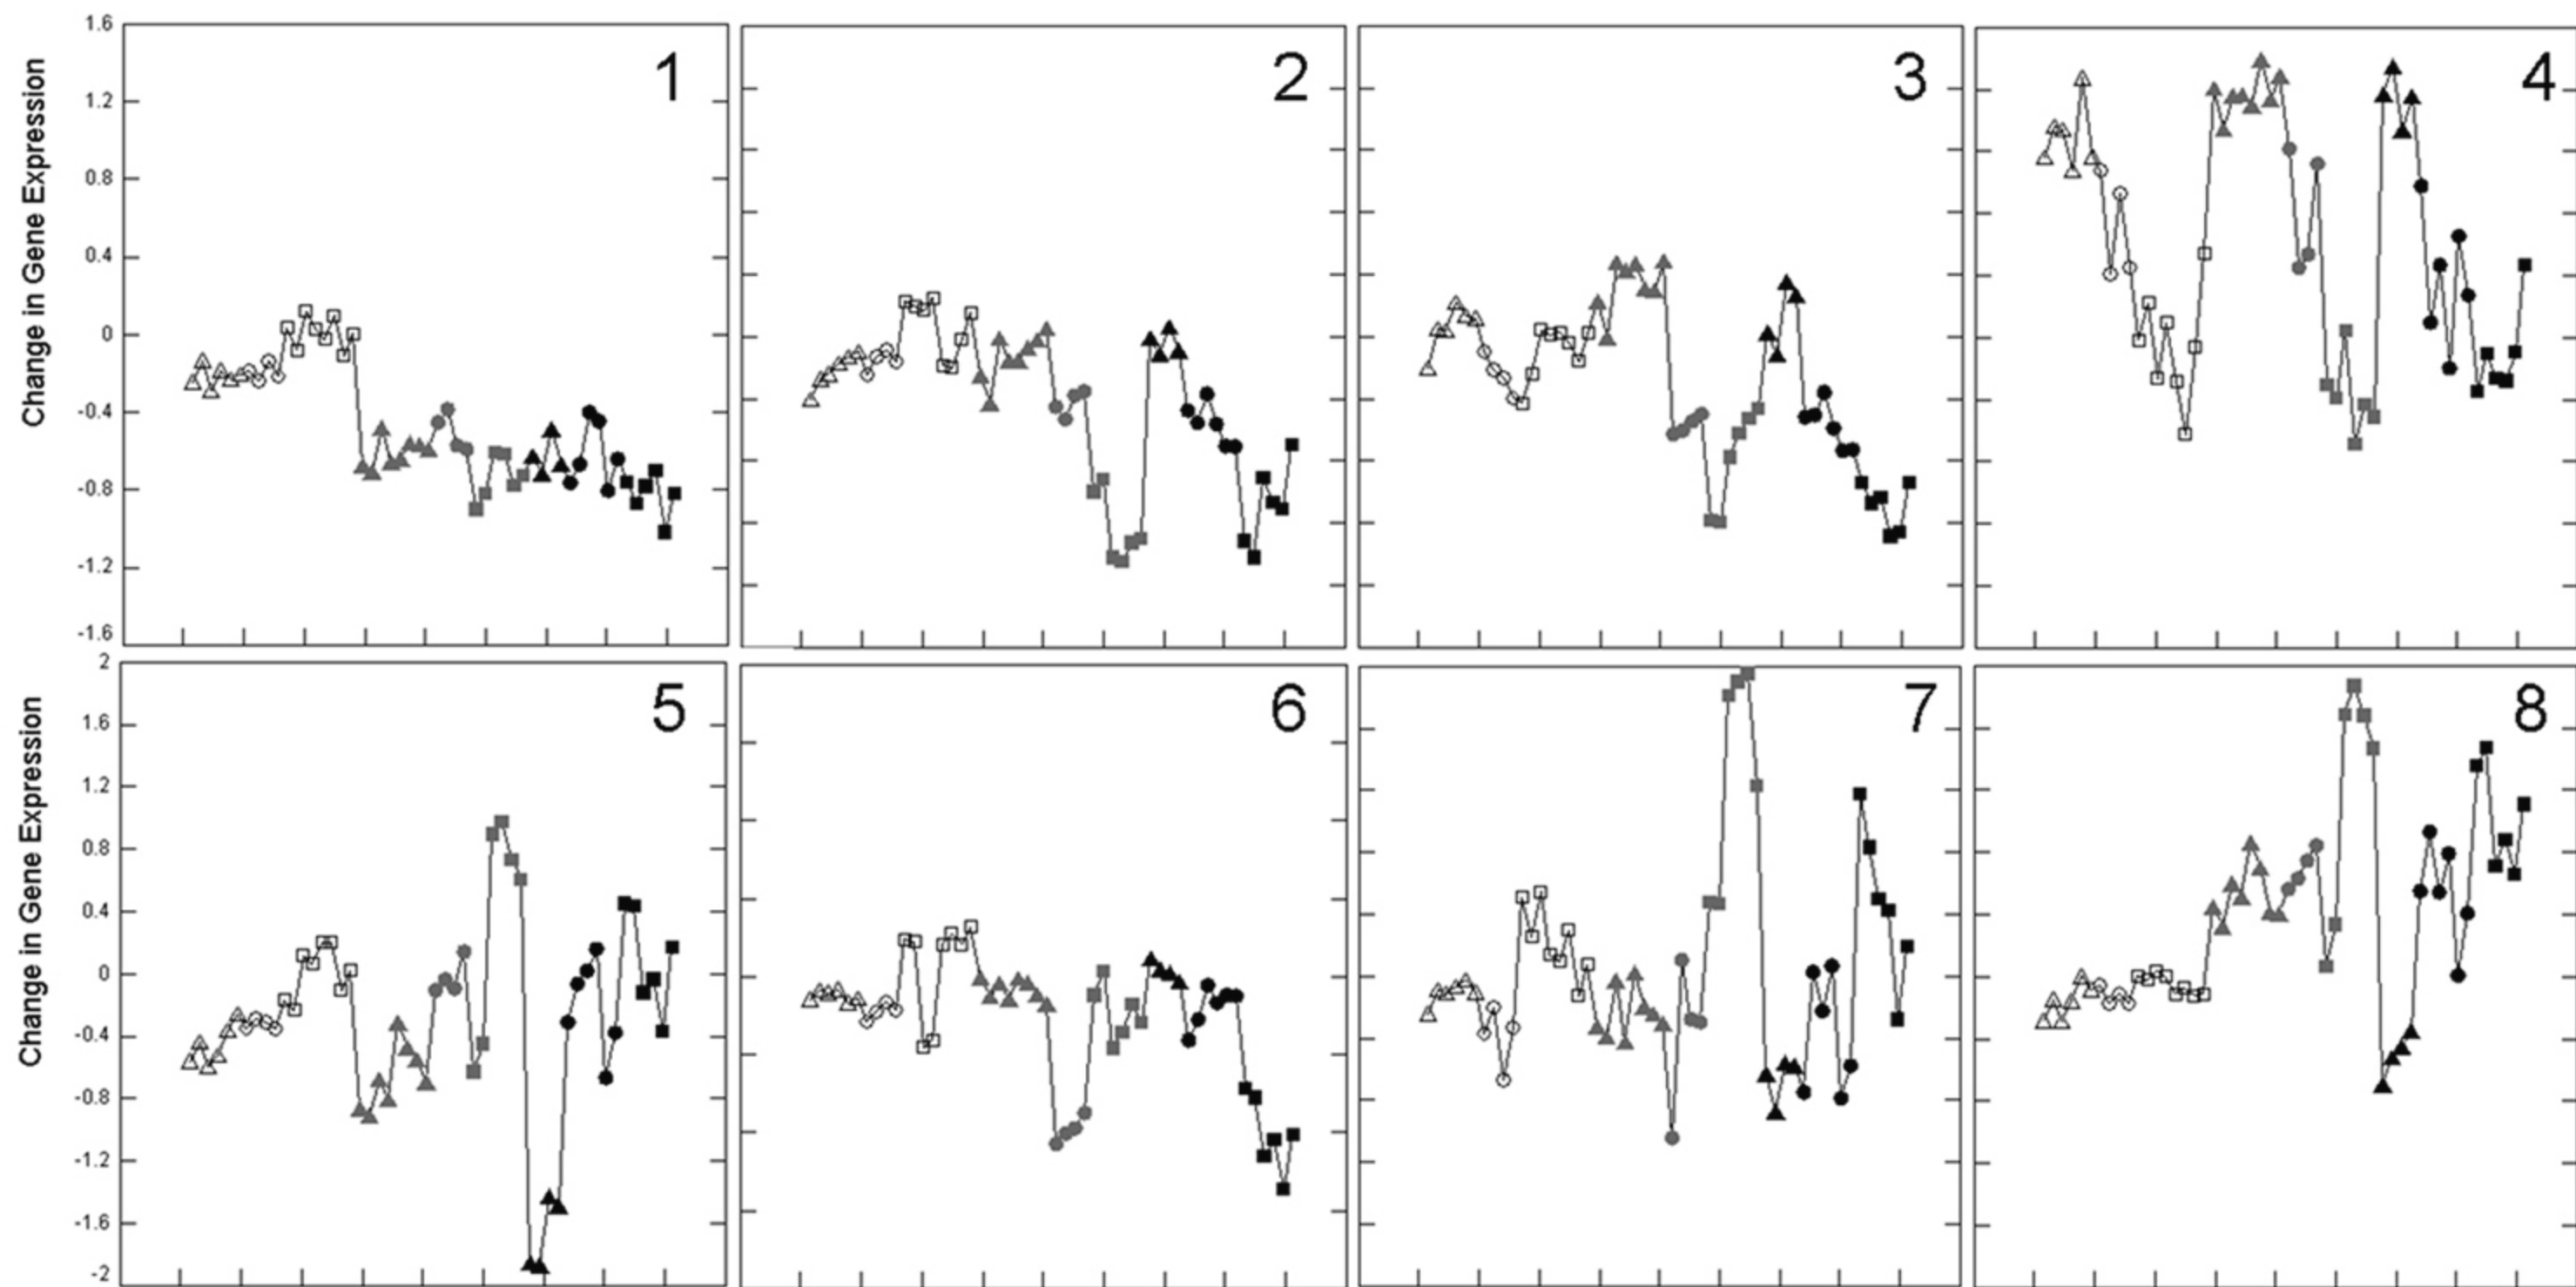

Supplement: pnas_0706987104_2.pdf [file pnas_0706987104_2.pdf]

PCA Mapping (70.4%)

a)

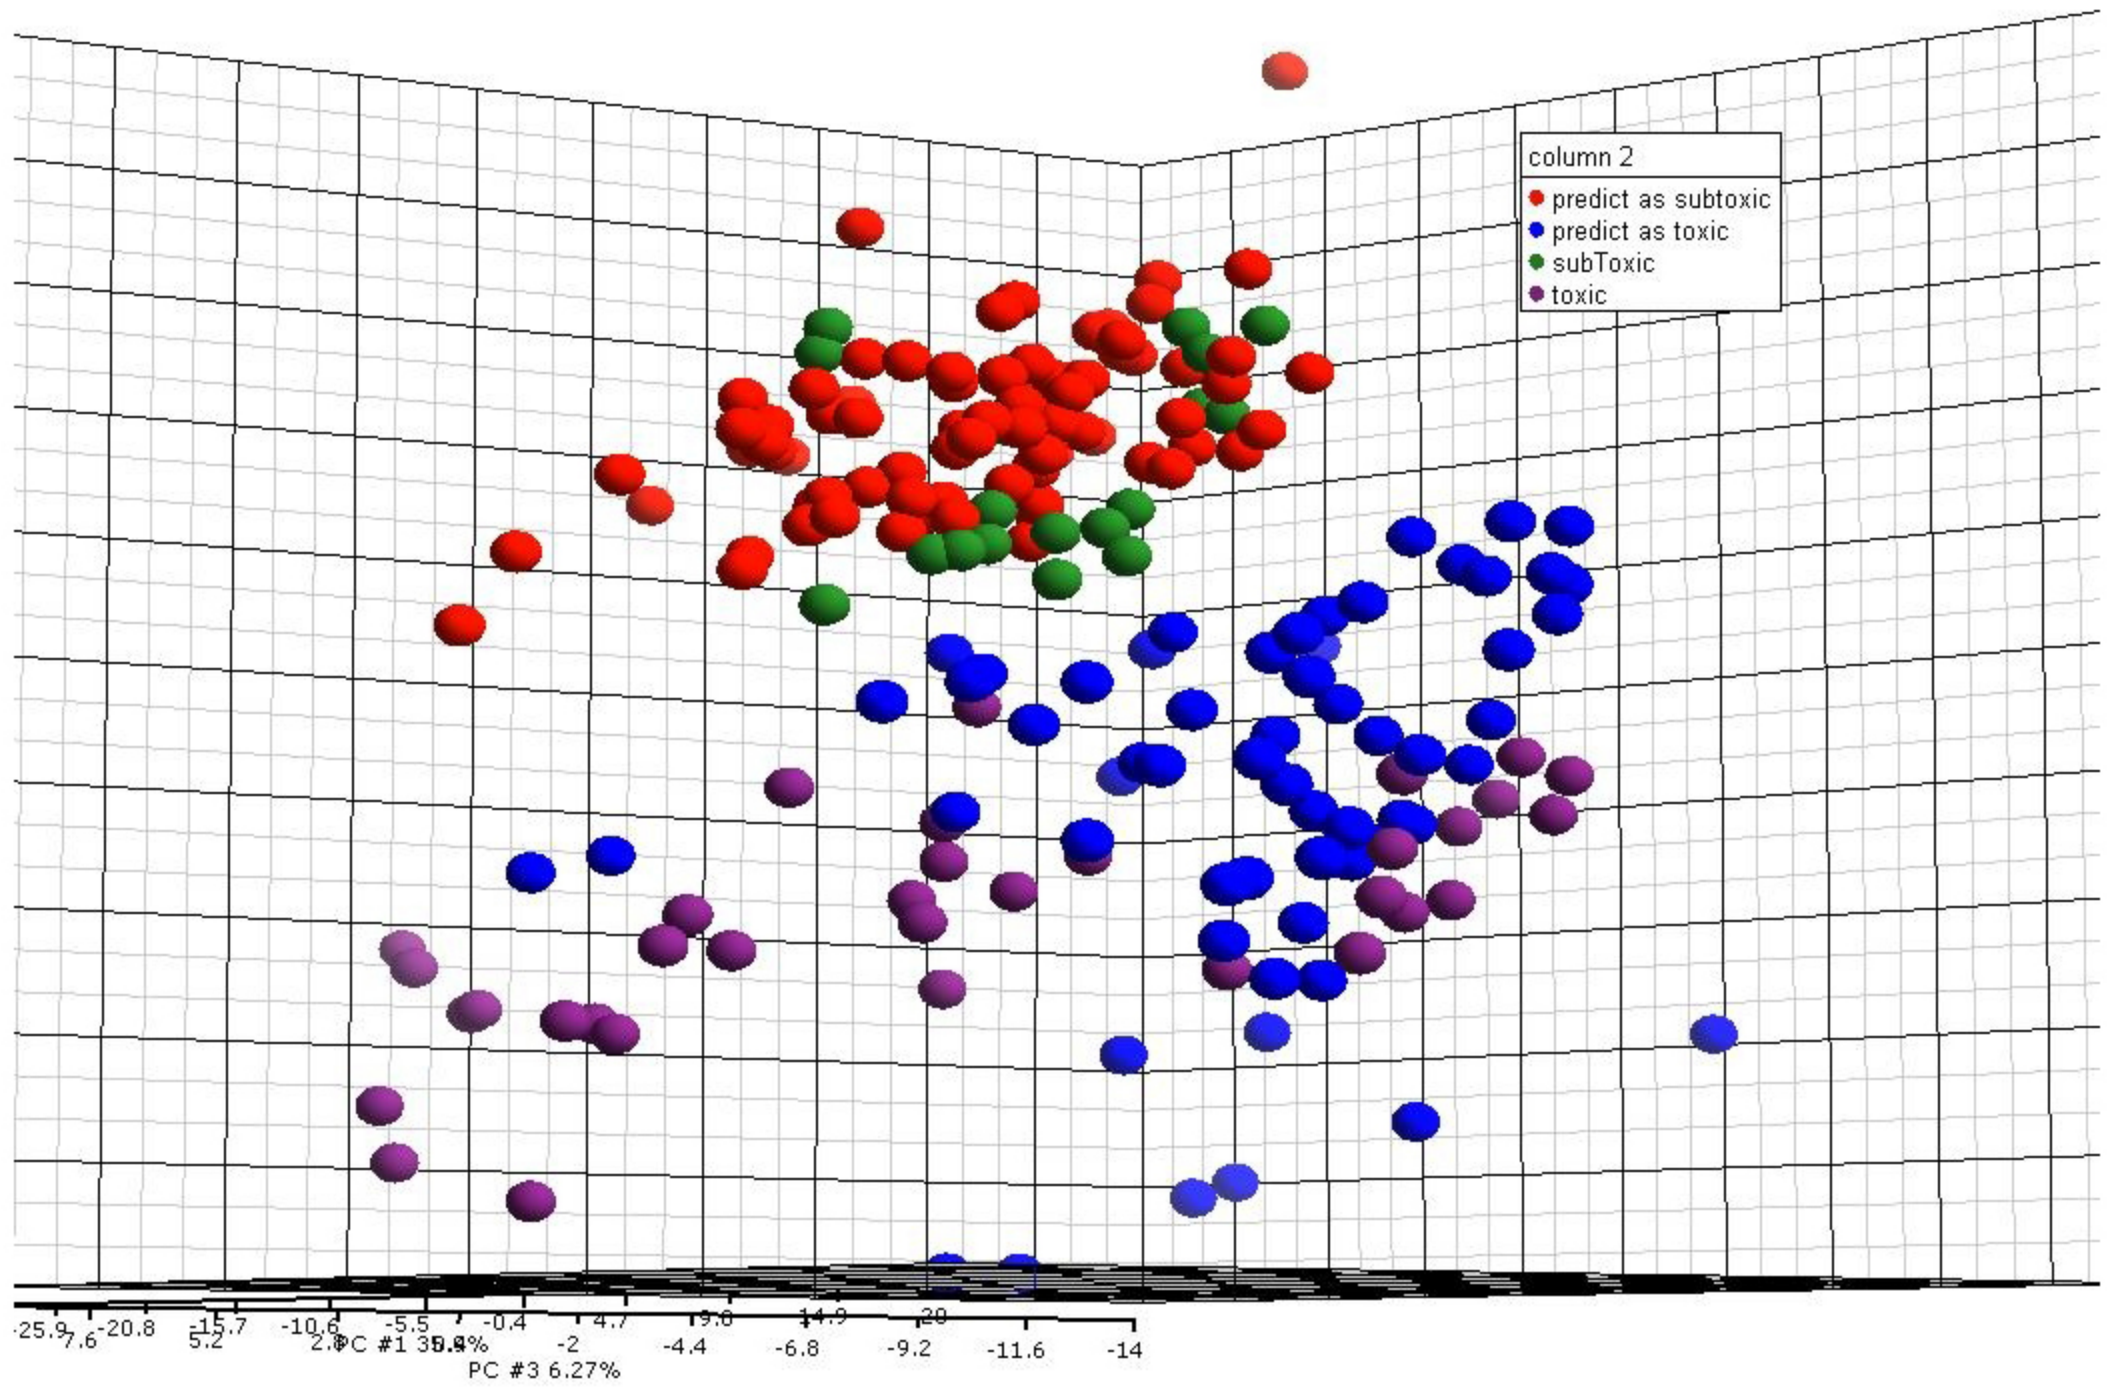

b)

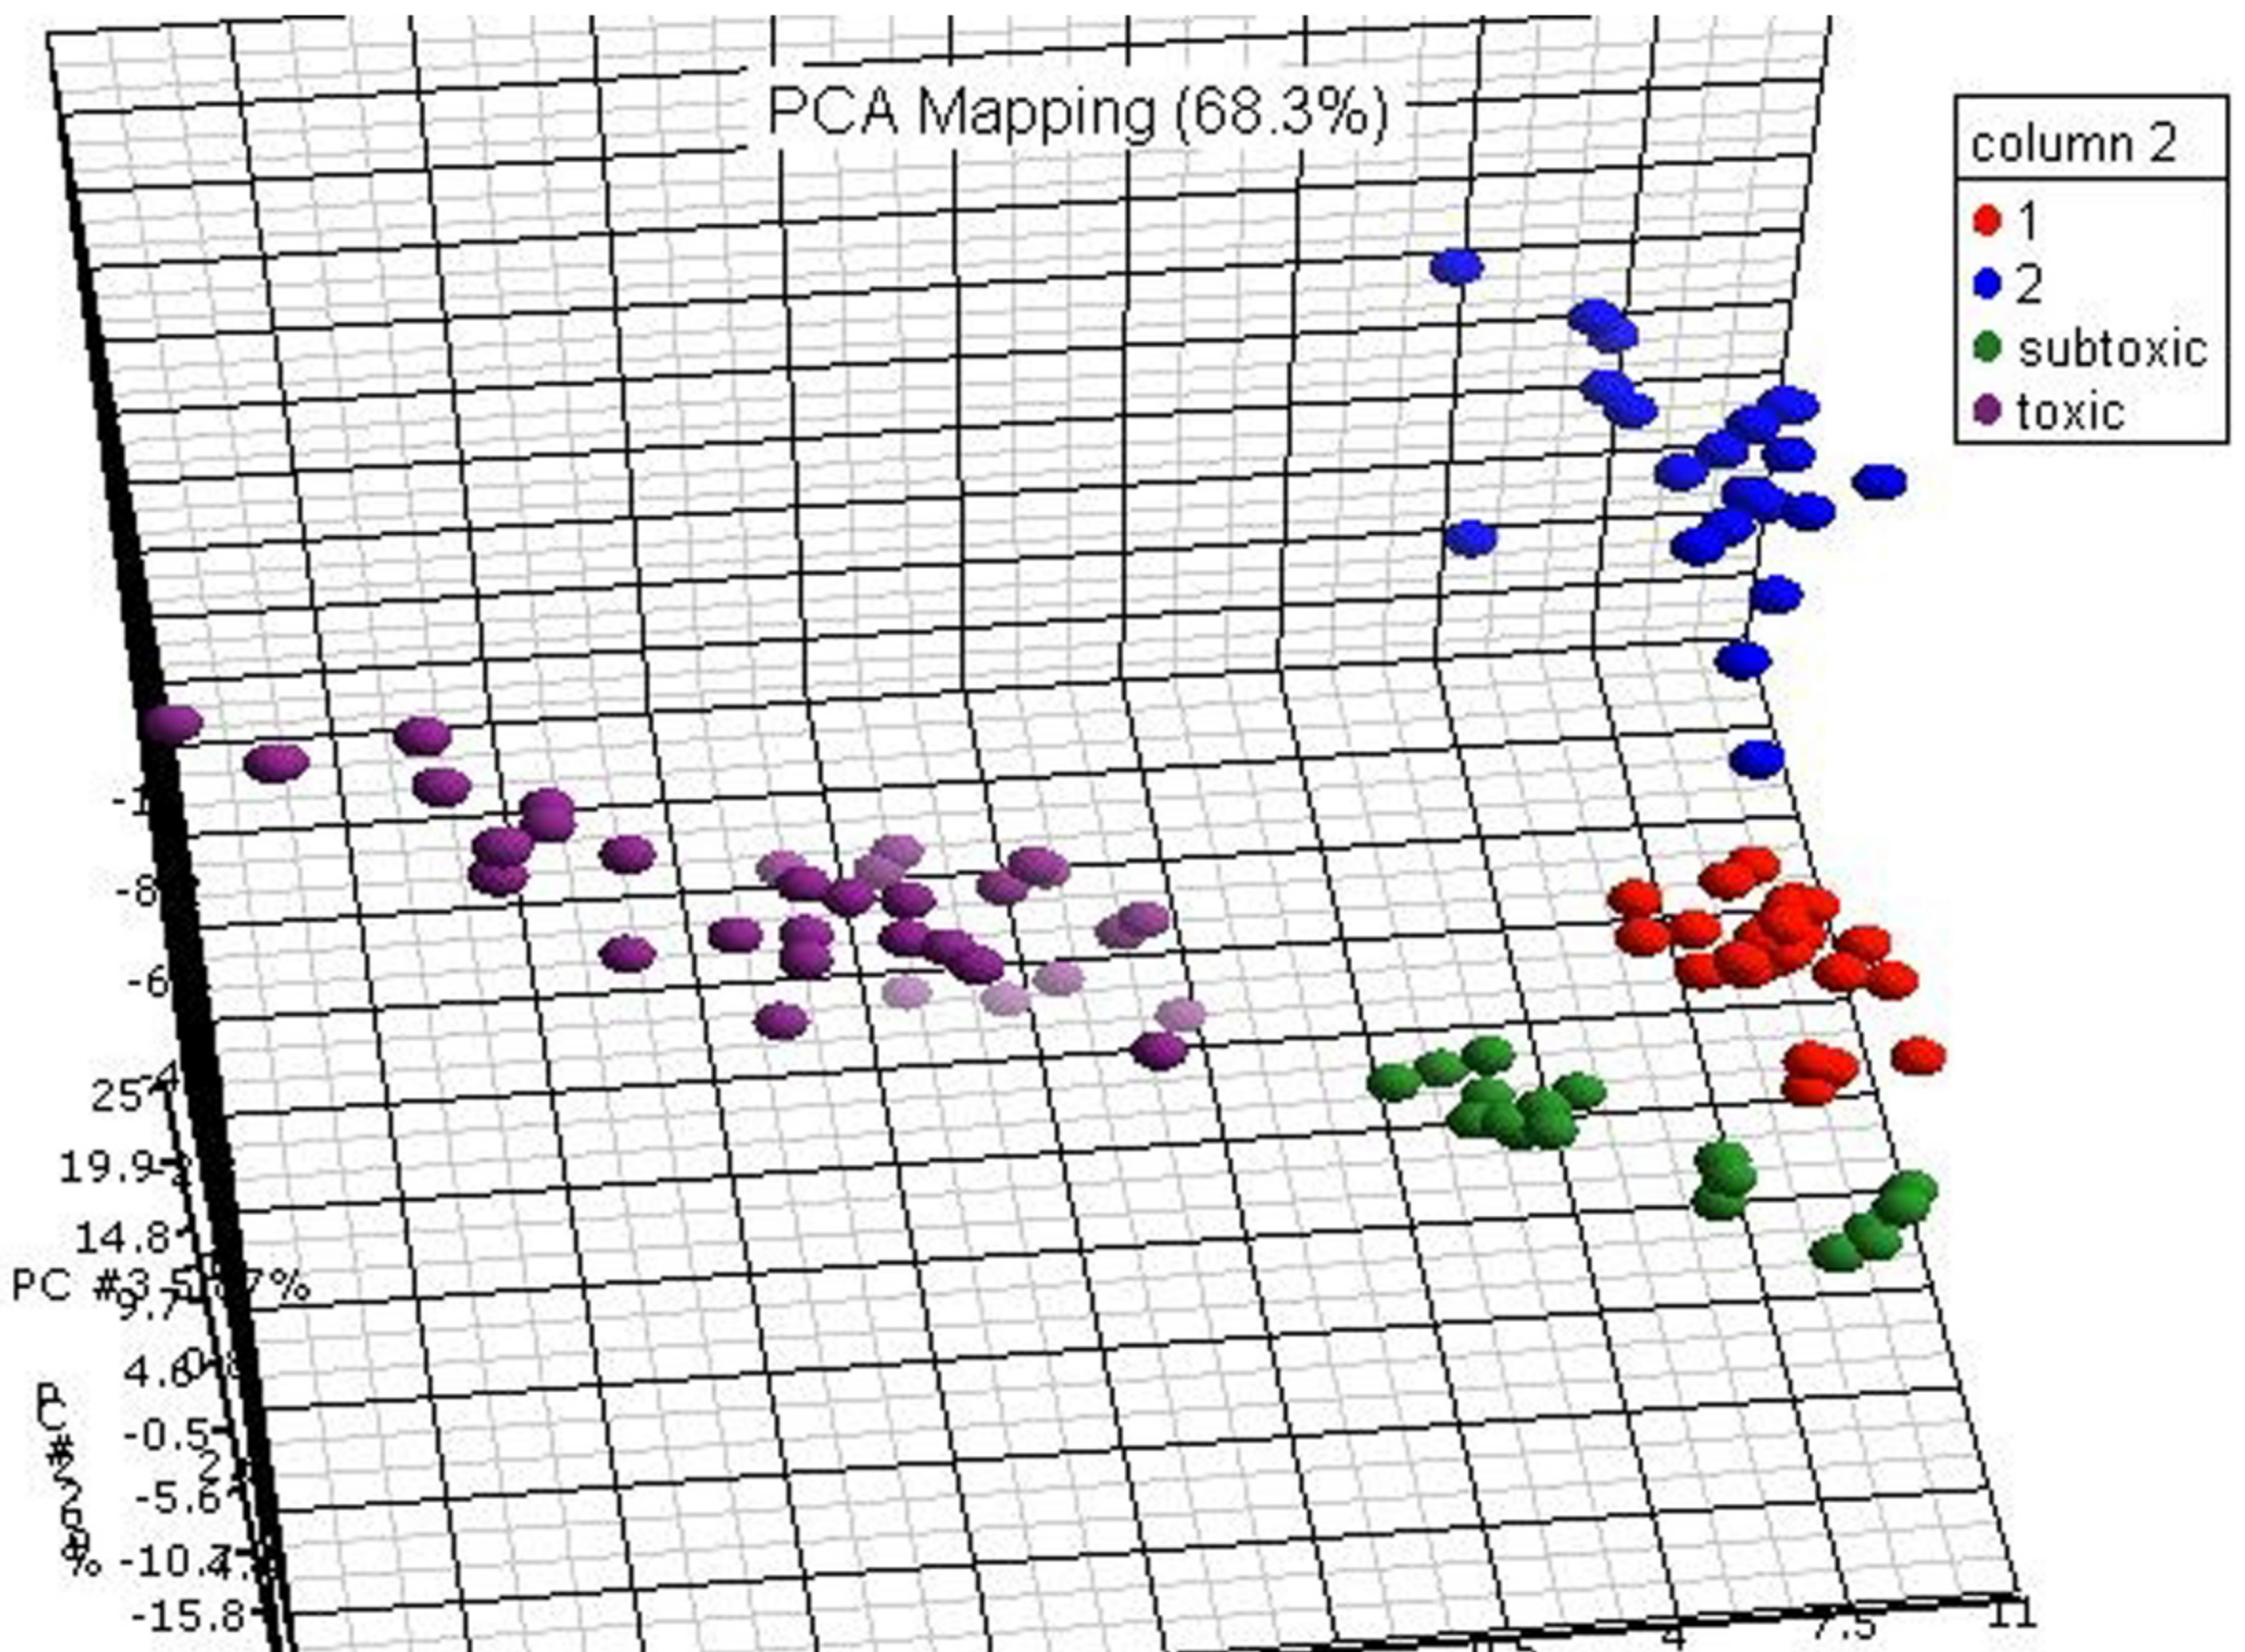

Supplement: pnas_0706987104_3.pdf [file pnas_0706987104_3.pdf]
